# Supplementary material for: Histone variant MacroH2A1 is downregulated in prostate cancer and influences malignant cell phenotype
Source: Springer Nature journal article supplement (doi:10.1186/s12935-019-0835-9), 2019-04-29
Supplement: MOESM3 [file 16685178]

**Additional File 3**

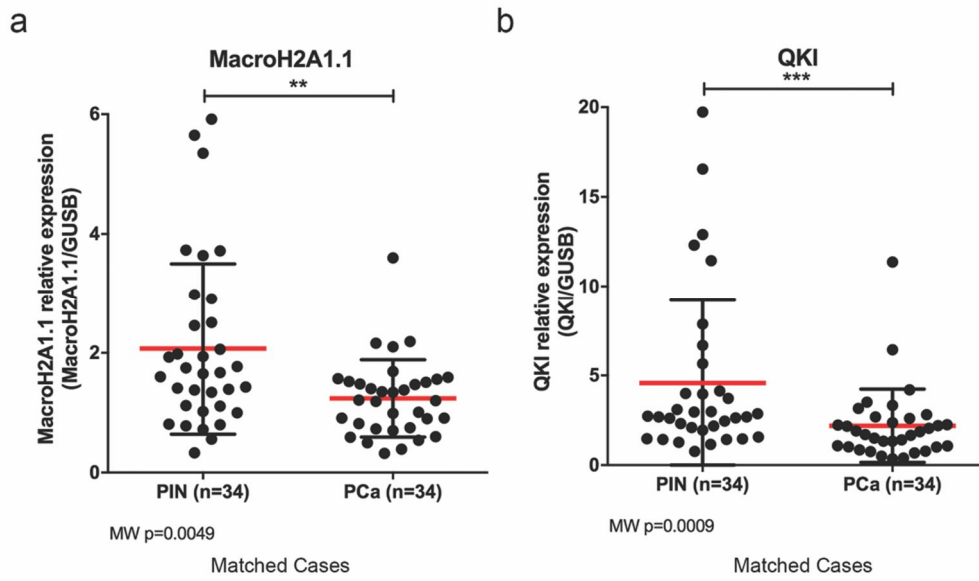

**Fig S1** Transcript levels of **(a)** macroH2A1.1 and **(b)** QKI in matched PIN and PCa (n=34) lesions from the same patients, assessed by RT-qPCR and normalized to GUSB mRNA levels. Mann-Whitney U-test: \*\*p<0.01, \*\*\*p<0.001

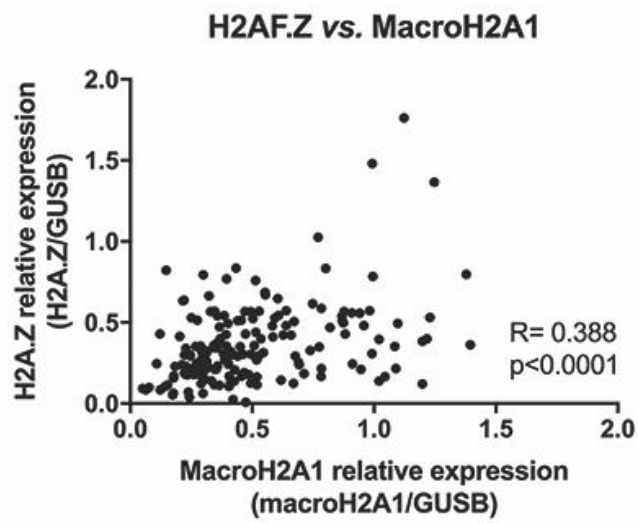

**Fig S2** Correlation between macroH2A1 and H2A.Z transcript levels ( $R=0.388$ ,  $p<0.0001$ ) in prostate cancer samples ( $n=197$ ), assessed by RT-qPCR and normalized to GUSB. (R coefficient calculated by Spearman's rank correlation)

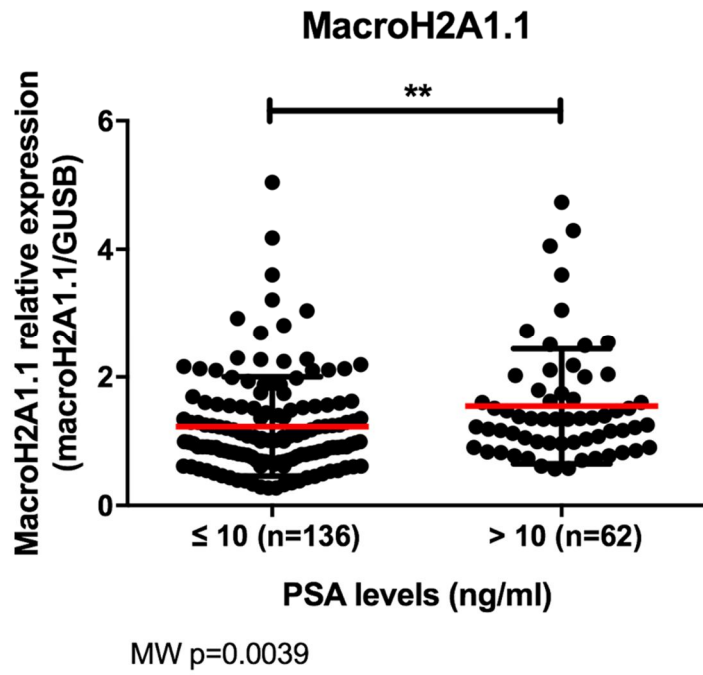

**Fig S3** Distribution of macroH2A1.1 mRNA levels in prostate cancer tissue samples, assessed by RT-qPCR and normalized to GUSB, according to categorized  $\leq 10$  ng/mL (n=136) and  $> 10$  ng/mL (n=62) PSA levels . Mann-Whitney U-test: \*\* $p < 0.01$

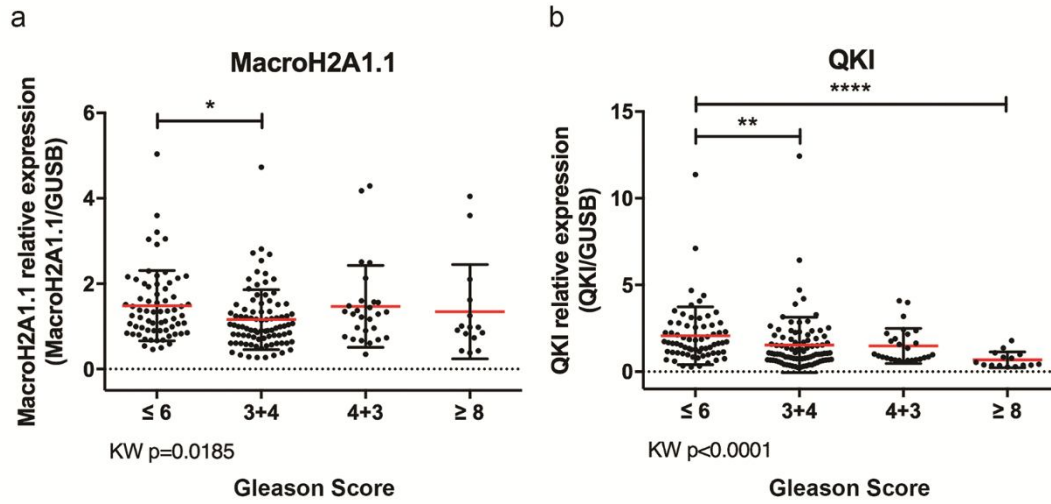

**Fig S4** Distribution of **(a)** MacroH2A1.1 and **(b)** QKI mRNA levels assessed by RT-qPCR and normalized to GUSB, among Gleason scores  $\leq 6$ , 7 (3+4), 7 (4+3) and  $\geq 8$  prostate cancer tissue samples. Kruskal-Wallis Test: Adjusted  $*p < 0.05$ ,  $**p < 0.01$ ,  $****p < 0.0001$ .

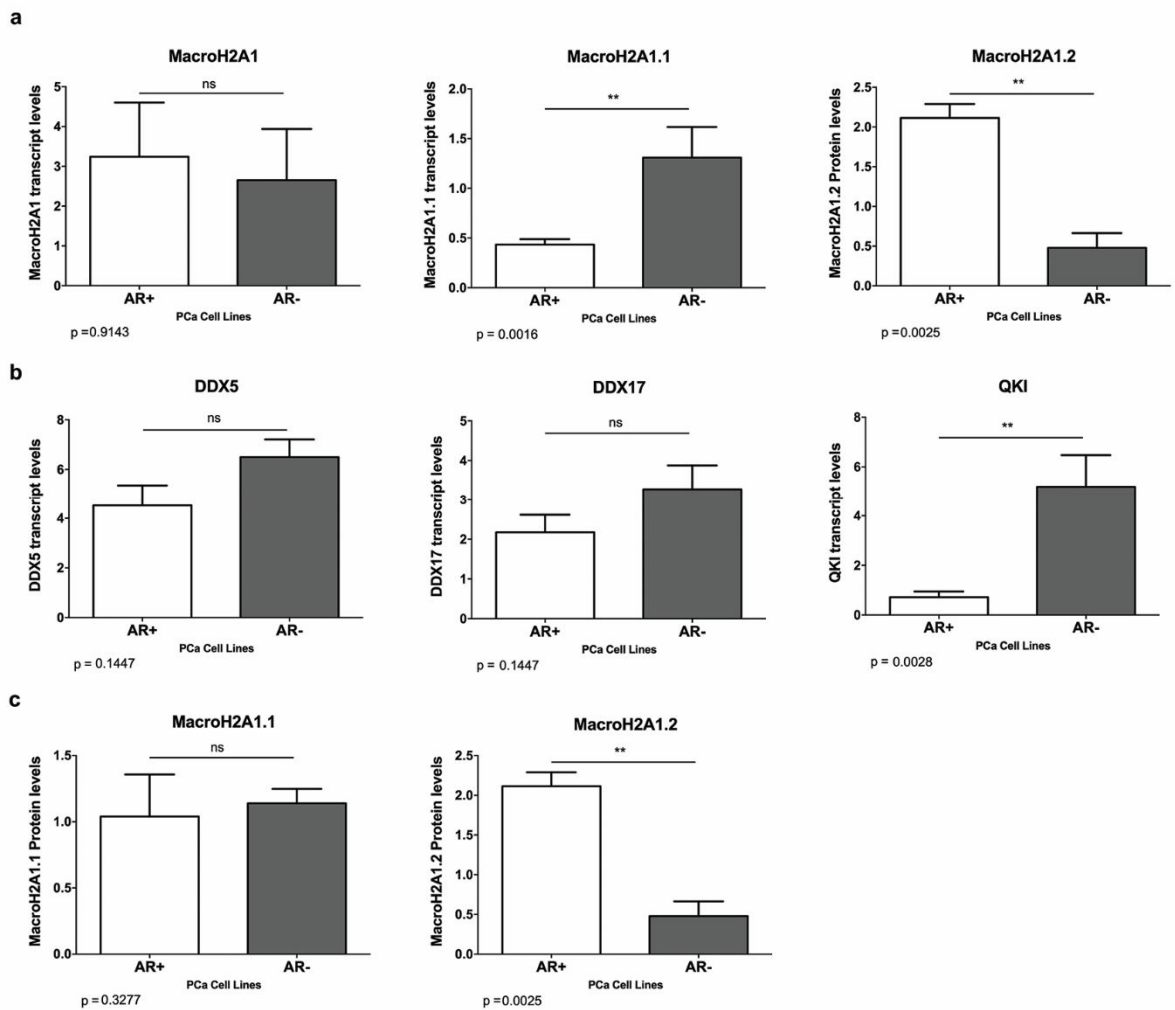

**Fig S5 (a)** Distribution of transcript levels of total macroH2A1, macroH2A1.1 and macroH2A1.2, assessed by RT-qPCR and normalized to GUSB mRNA levels, in androgen-receptor positive prostate cancer cell lines (22Rv1, LNCaP and VCaP), and in androgen-receptor negative prostate cancer cell lines (DU145 and PC-3). **(b)** Distribution of transcript levels of splicing regulators DDX5, DDX17 and QKI, assessed by RT-qPCR and normalized to GUSB, in androgen positive and negative prostate cancer cell lines. **(c)** Distribution of macroH2A1.1 and macroH2A1.2 protein levels, normalized to  $\beta$ -actin, in androgen positive and negative prostate cancer cell lines. Mann-Whitney U-test: \*\* $p < 0.01$ , \*\*\* $p < 0.001$ . ns – non significant.
